# Supplementary material for: Identification of LncRNA NUSAP1 as a Novel Biomarker for Colorectal Cancer Progression and Metastasis
Source: Research Square preprint supplement (doi:10.21203/rs.3.rs-7845800/v1), 2025-10-28
Supplement: Supplementary file 1 [file 7edb39fa7c509bff94f03372.docx]

Supplementary table1. Information and sequence of LncRNA NUSAP1

| LncRNA #ID | MSTRG.40707.1 | Chromosomal location | Chr 15：41372039-41374647 | |
| --- | --- | --- | --- | --- |
| Source gene | NUSAP1 |  |  |  |
| Sequence |  |  |  |  |
| GCTGAGGCAGGAGAATCCCTTGAACCAGGGAGTCGGAGGTTGCAGCGAGCCGAGATTGCACCACAGCACTCCAGCCTGGCGACAGTGAGACTGTGTCTCAAAAAAAGAAAAAAGTTATAGCTTGAATGTTTGTATCTCCTGCGATCCCAAATTCATATTGAAATCCTAACTGTCAATATGACTGGTGTAAGGAAGTAGGGCCTTTGGGAGGTAAATAGGTCATGAATGGGATTCAGGGCCTTATATAGGGACCCCATAGAATTTTCTCTAGCTCTCTTTCTGCCACATGAGCATACAACAAGAAGTTGGTAGTCTGCTACCTGGAAAACAGCCCTCACCAGAATCATGCTAGTGCCCTGATCTGCCCTCATCCAGCCTCCAGAACTATGAGAAAGAAATTACCGCTGTTTATAAGATACAGTCTTTGGTGCTTTGTTATATAATAGCAGCCGCAAAGGACTAAGACAATCTACATGAATAGTCTGAAATAGATGAAAGTCTGAAATAAGGGTTAAAATGGAGAAAAGGGGAAAACAATAATTGAGGAAAGCTAACCATTGAGATTAATTTCCTTTGCTAAGCAGCTTTGTAAATGTTCTGAATATTTTGTTTTTGTATTTTTAGTAGAGACGGGGTTTCAGTGTGTTAGCCAGGATGGTCTCAATCTCCTGAACTCATGATCCACCTGCCTTGGCCTCCCAAAGTGCTGGGATCCTAGGATCAGCTGGGAGTTTAGAATTCTGTTGAAGGAAATGACGGTAACTTTTCAGCTTATTTCCCTGATAACAGATATGGCTCACACCTGTAATCTCAGCACTTTGGGAGGCTGAGGCAGGAGGATTGTTTAAAGTCAGGAATATTATTAATAAGGGCTCTTATCACTTCAGAATATTAATTTTTGGCTGGGCGCGGTGGCTCATGCCTGTATTTTCATAGGGGGAAGCCACAGGTCATTGCCAAATGTGAACCCTTGCCTACATCTGTGAAACAGCAATCAGGATCTAAGACCACTTAGTTAAAAAAAAGCACAAAACCCTGTGTTCAAGCTATCCCACTGTATCAGTATCAAATGCTGACAGGGAGTAGAACAAGGGACTGCCATACACTGCCACTGGAAGCACAGATTGGTACAATTCATTCAGGACAGTAAATGTCTGCATATTTTCCAATCCAGCTGTCCTGCTCCTAGGTCTAGGGAAACTCTTGCACATGTACAGGAGACATGTTTAAGAGTATTCATAGCAACATCATATATAATAATGGAAGCTGGAACCACCCACATGTTCGTGAATAGTAAAATAGATAAACTGACATATACCCACACCACTGAAAAATACTGTGAAAACGAGTCAACATGGTTGAATCTTGAAACATGAAGTCTGTGGTCTGGGATCCTGTTAGTGTCAGAGTCCTCCAGGACCTTTCCGAGGCTGCAACGAATACTGTGCTCATCCTCCGAATCCCTGAGTCCCACAAGGGGCACAGTGCCCTTCCTGGAGGGTCACCATTTTAGGATTAGATGGAGCTCTCAGGCAGATATCTGGTTTTTGCTTATGTCTCTGGCATTTCCCCCACTAGTACACAATTAAAAATACACTATGGTAAAATTTTTGCTTTTGATTATAGAAATGGAAAGGGTTTAAGGAAACAGATACAGGCCGGGCGCAGTGGCTCACGCTTGTAAT | | | | |
